# Supplementary material for: Quantifying the clear-sky temperature inversion frequency and strength over the Arctic Ocean during summer and winter seasons from AIRS profiles
Source: Copernicus journal article supplement (doi:10.5194/acp-10-5565-2010), 2010-06-22
Supplement: Supplementary file 1 [file acp-10-5565-2010-supplement.pdf]

## Supplementary figure

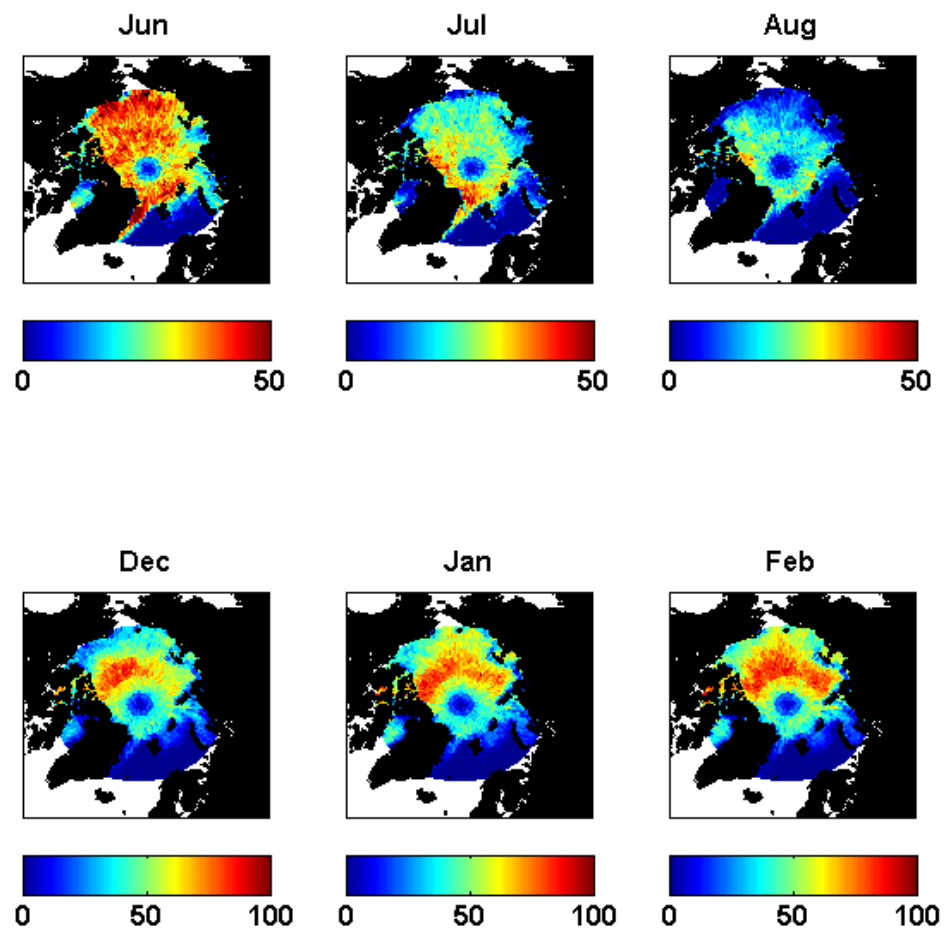

Fig. S1: Total number of profiles used for the analysis for each summer and winter months for the period 2003-2008.
